# Supplementary material for: DNA catenation maintains structure of human metaphase chromosomes
Source: PubMed Central journal article supplement — Nucleic Acids Res. 2012 Oct 12;40(22):11428–34. doi: 10.1093/nar/gks931 (PMC3526300; doi:10.1093/nar/gks931), 2012-10-12
Supplement: supp_gks931_nar-02004-f-2012-File005.pdf [file supp_gks931_nar-02004-f-2012-File005.pdf]

## Supplementary Information

for Bauer et al. "DNA Catenation Maintains Structure of Human Metaphase Chromosomes"

### Supplementary Methods

Timelapse images of on-chip chromosome digestions with proteinase K were loaded into ImageJ and any timelapse images containing multiple chromosomes were cropped to provide separate timelapse files. A custom ImageJ Java macro was used to carry out morphometry analysis on timelapse images of chromosome digestions in ImageJ:

```
setAutoThreshold("Default");
setAutoThreshold("Default dark");
setAutoThreshold("Default dark");
run("Convert to Mask", "calculate black");
setAutoThreshold("Default dark");
run("Convert to Mask", "calculate black");
run("Open", "stack");
run("Fill Holes", "stack");
run("Analyze Particles...", "size=100-Infinity
    circularity=0.00-1.00 show=Nothing display clear
    summarize stack");
saveAs("Text", "/DataFolder/file.xls");
```

The output from each run was put into Excel & plotted vs. time. The morphology of the chromosomes after 20 minutes' digestion was used to compare between different chromosome samples.

### Supplementary Movie Legends

#### Movie S1– On-chip Chromosome Protease Digestion

Timelapse of proteinase K digestion of a native metaphase chromosome stained with YOYO-1 dye. The chromosomes expand during digestion and retain their canonical 'X' shape.

#### Movie S2 – DNA Catenation at the Centromere

Using on-chip fluidic manipulation to explore chromosome structure after proteinase K digestion. After looking around inside the chip and adjusting illumination, the chromosome is subjected to fluid flow to separate the chromatid bodies. Discrete fibres are visible (e.g. at 1:18) catenating the sister chromatids.

#### Movie S3 – 3D View of DNA Catenation

Three-dimensional projection of the real-time epifluorescence movie highlights the DNA fibres catenating sister chromatids. The corresponding two-dimensional movie is shown adjacent, with the region shown in 3D indicated (white rectangle) along with the perspective (white arrow).
